# Supplementary material for: Synergistic effect between atomically dispersed Fe and Co metal sites for enhanced oxygen reduction reaction
Source: Royal Society of Chemistry journal article supplement (doi:10.1039/c9ta12516g), 2020-01-01
Supplement: c9ta12516g1.pdf [file c9ta12516g1.pdf]

**Electronic Supplementary Information (ESI)**

**Synergistic effect between atomically dispersed Fe and Co metal sites for enhanced oxygen reduction reaction**

Lulu Chen,<sup>a,b</sup> Yelong Zhang,<sup>c</sup> Lile Dong,<sup>a</sup> Wenxiu Yang,<sup>e</sup> Xiangjian Liu,<sup>a,b</sup> Ling Long,<sup>a,b</sup> Changyu Liu,<sup>\*d</sup> Shaojun Dong <sup>\*a,b</sup> and Jianbo Jia <sup>\*a,b,d</sup>

<sup>a</sup> State Key Laboratory of Electroanalytical Chemistry, Changchun Institute of Applied Chemistry, Chinese Academy of Sciences, Changchun 130022, China.

<sup>b</sup> University of Science and Technology of China, Hefei 230026, China.

<sup>c</sup> School of Applied Physics and Materials, Wuyi University, Jiangmen 529020, China.

<sup>d</sup> School of Biotechnology and Health Sciences, Wuyi University, Jiangmen 529020, China.

<sup>e</sup> School of Materials Science and Engineering, Beijing Institute of Technology, Beijing 100081 China.

\* Corresponding author

Changyu Liu – Email: [cylu@ciac.ac.cn](mailto:cylu@ciac.ac.cn);

Shaojun Dong – Email: [dongsj@ciac.ac.cn](mailto:dongsj@ciac.ac.cn);

Jianbo Jia – Email: [jbja@ciac.ac.cn](mailto:jbja@ciac.ac.cn) or [jbja@wyu.edu.cn](mailto:jbja@wyu.edu.cn)

## **Experimental section**

**Characterization:** Atomic-resolution spherical aberration corrected scanning transmission electron microscope (AC-TEM) image was achieved using FEI Titan Cubed Themis G2 300. Transmission electron microscope (TEM) images, high resolution TEM images, and elemental mapping images were obtained from FEI TECNAI G2. An XL 30 ESEM FEG SEM was employed to acquire scanning electron microscopy (SEM) images. X-ray diffraction (XRD) patterns of the samples were carried out on a Bruker D8 ADVANCE. X-ray photoelectron spectroscopy (XPS) was obtained from ESCALAB 250. Inductively coupled plasma optical emission spectrometry (ICP-OES) was performed on iCAP 6000 SERIES (Thermo Scientific, USA). Nitrogen adsorption-desorption isothermals were performed on ASAP 2020 Physisorption Analyzer. X-ray absorption near-edge structures (XANES) of the catalysts were conducted on 1W2B end station, Beijing Synchrotron Radiation Facility (BSRF). The K-edge spectra of Fe and Co were obtained at room temperature in transmission mode. The electrochemical measurements were carried out on CHI 842B work stations. Rotating ring-disk electrode (RRDE) techniques were performed on a Model RRDE-3A Apparatus.

### **Equations in Electrochemical characterization**

The  $\text{HO}_2^-$  yield ( $\text{HO}_2^- \%$ ) and electron transfer number ( $n$ ) of the catalysts were obtained from the equations:

$$HO_2^- \% = \frac{200 \frac{I_r}{N}}{I_d + \frac{I_r}{N}}$$

$$n = \frac{4I_d}{I_d + \frac{I_r}{N}}$$

As the current collection efficiency, N was determined to be 0.44.  $I_d$  and  $I_r$  were the detected current on the disk and ring electrodes, respectively. LSV curves at different rotating speed were recorded to calculate the electron transfer number by the

Koutecky-Levich equation:

$$\frac{1}{J} = \frac{1}{J_L} + \frac{1}{J_K} = \frac{1}{B\omega^{1/2}} + \frac{1}{J_K}$$

$$B = 0.62nFC_0(D_0)^{2/3}V^{-1/6}$$

where J is the measured current density,  $J_K$  and  $J_L$  are the kinetic and limiting current densities,  $\omega$  is the angular velocity of the rotating disk, n is the electron transfer number, F is the Faraday constant (96485 C mol<sup>-1</sup>),  $C_0$  is the bulk concentration of O<sub>2</sub> in 0.10 M KOH solution ( $1.2 \times 10^{-6}$  mol cm<sup>-3</sup>),  $D_0$  is the diffusion coefficient of O<sub>2</sub> ( $1.9 \times 10^{-5}$  cm<sup>2</sup> s<sup>-1</sup>), and V is the kinematic viscosity of 0.10 M KOH solution (0.01 cm<sup>2</sup> s<sup>-1</sup>).

**The free energy changes of ORR:** Free energy changes from initial states to final states of the reaction is calculated as follows:

$$\Delta G = \Delta E + \Delta ZPE - T\Delta S + \Delta G_U + \Delta G_{pH}$$

Where  $\Delta E$  is the total energy change based on the DFT calculations,  $\Delta ZPE$  and  $\Delta S$  are the changes in zero-point energy and in entropy, respectively. T is room temperature

(298.15 K).  $\Delta G = -eU$ , where  $U$  is the electrode potential with respect to standard hydrogen electrode, and  $e$  is the transferred charge.  $\Delta G_{pH} = k_B T \ln 10 \times pH$ , where  $k_B$  is the Boltzmann constant. Previous study indicated that the theoretical working potential is independent of the pH, because the free energies for the elementary reactions vary in the same way with pH, thereby the potential determining step remains the same.<sup>[1]</sup> Therefore, to simplify the simulating results, the pH=0 is employed. The free energy of  $O_2$  is obtained from the free energy change of the reaction  $O_2 + 2H_2 \rightarrow 2H_2O$ , which is -4.92 eV at 298.15 K and a pressure of 0.035 bar.<sup>[2]</sup> The free energy of  $(H^+ + e^-)$  at standard conditions is assumed as the energy of  $1/2H_2$ .<sup>[2, 3]</sup> The entropy of the  $H_2$  is taken from the NIST database, while the entropies of the ORR intermediates are calculated from the vibrational frequencies.<sup>[4]</sup>

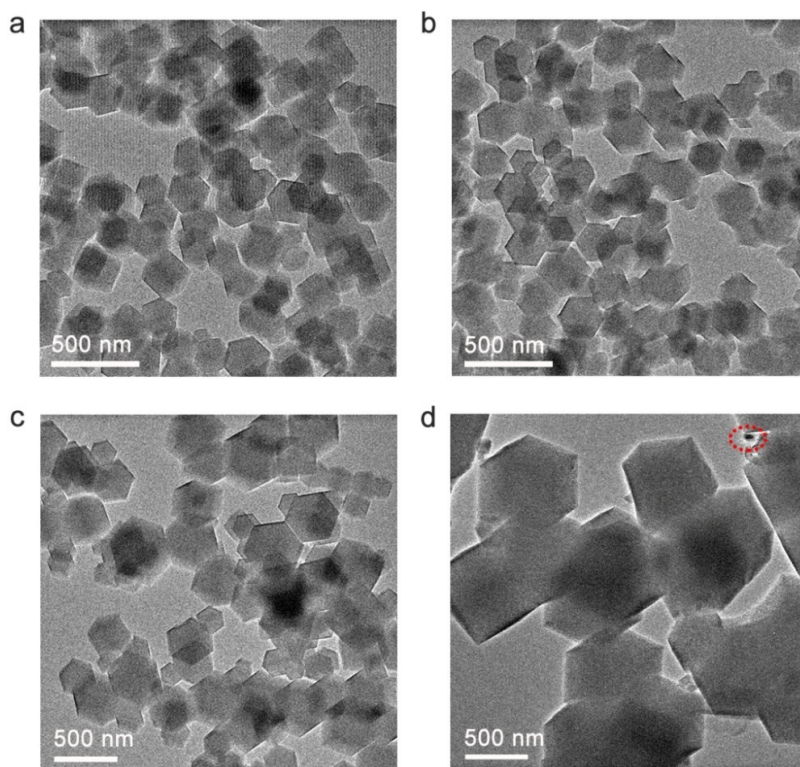

**Figure S1.** TEM images of (a)  $X_{100}$ -900, (b)  $X_{80}$ -900, (c)  $X_{40}$ -900, and (d)  $X_{20}$ -900. The red circle in d shows the Co nanoparticles in  $X_{20}$ -900.

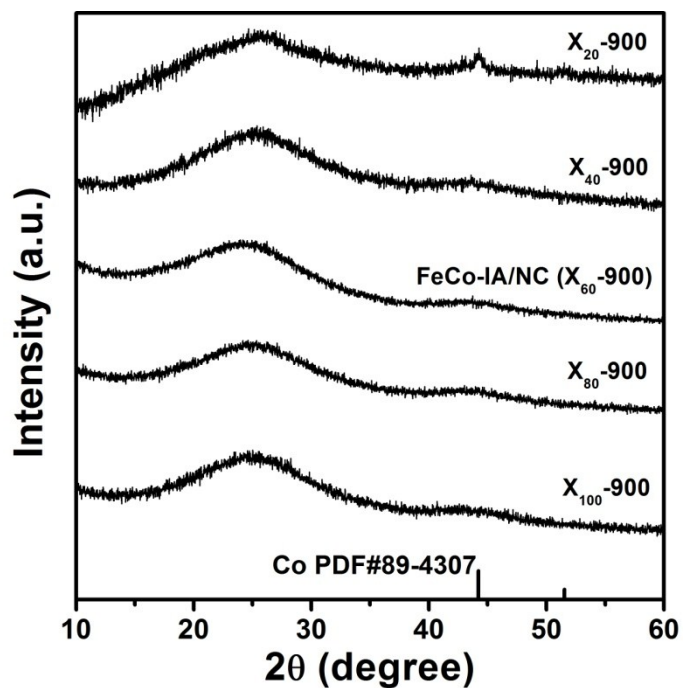

**Figure S2.** XRD patterns of  $X_{100}$ -900,  $X_{80}$ -900, Fe-IA/NC ( $X_{60}$ -900),  $X_{40}$ -900, and  $X_{20}$ -900.

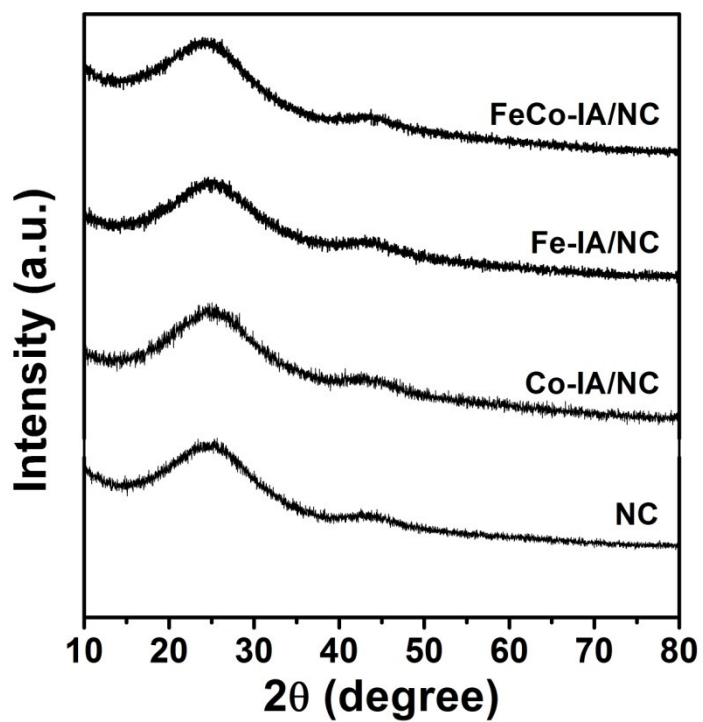

**Figure S3.** XRD patterns of FeCo-IA/NC, Fe-IA/NC, Co-IA/NC, and NC.



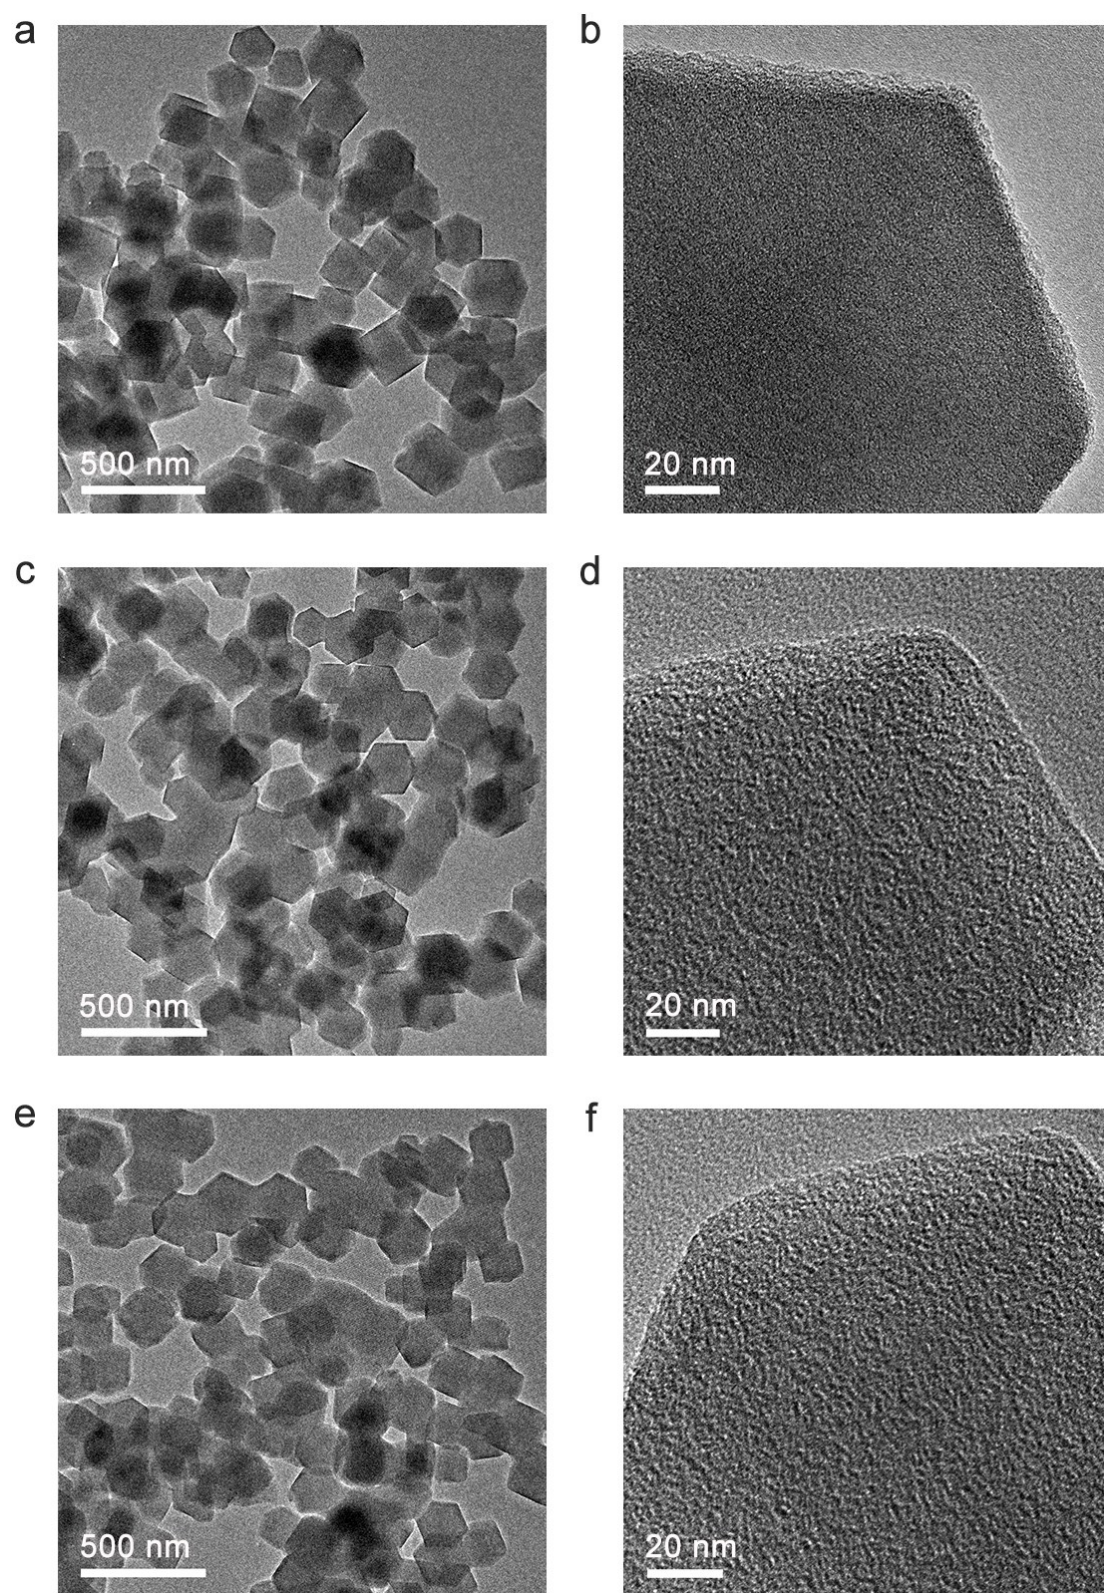

**Figure S4.** TEM images of (a-b) Fe-IA/NC, (c-d) Co-IA/NC, and (e-f) NC.

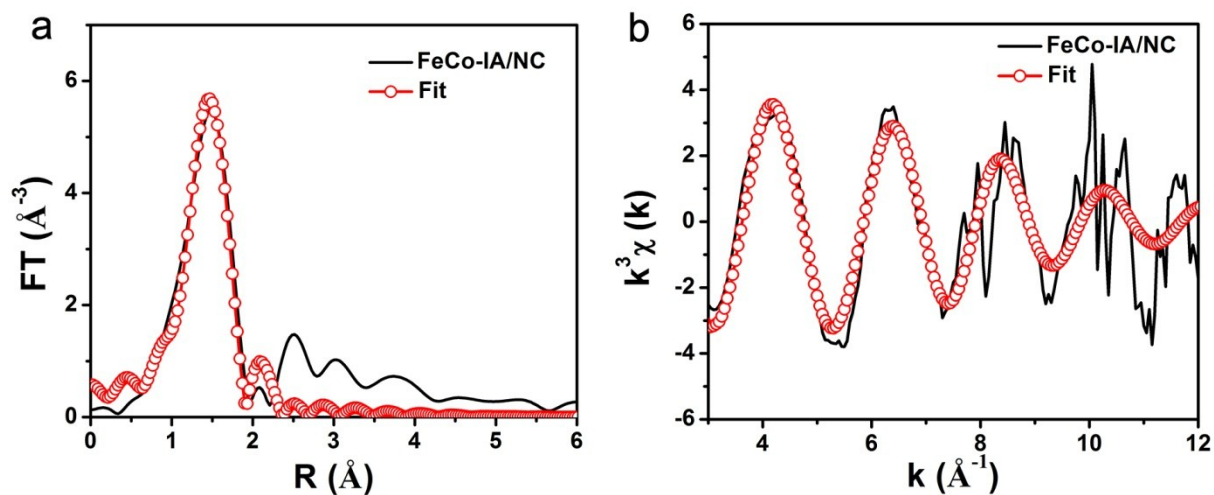

**Figure S5.** The corresponding EXAFS fitting curves of the FeCo-IA/NC in (a) R space and (b) k space at Fe K-edge.

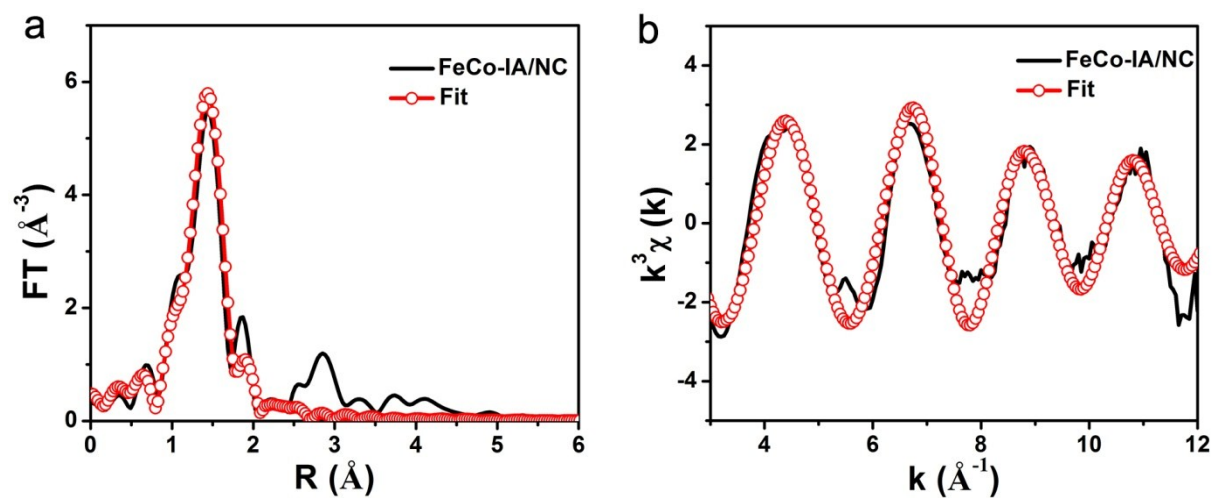

**Figure S6.** The corresponding EXAFS fitting curves of the FeCo-IA/NC in (a) R space and (b) k space at Co K-edge.

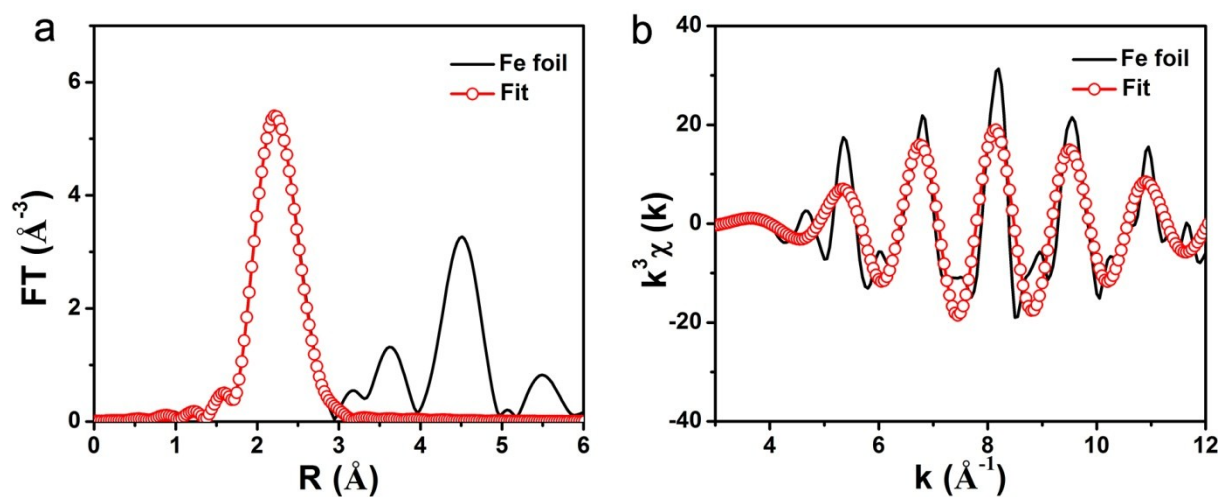

**Figure S7.** The corresponding EXAFS fitting curves of the Fe foil in (a) R space and (b) k space at Fe K-edge.

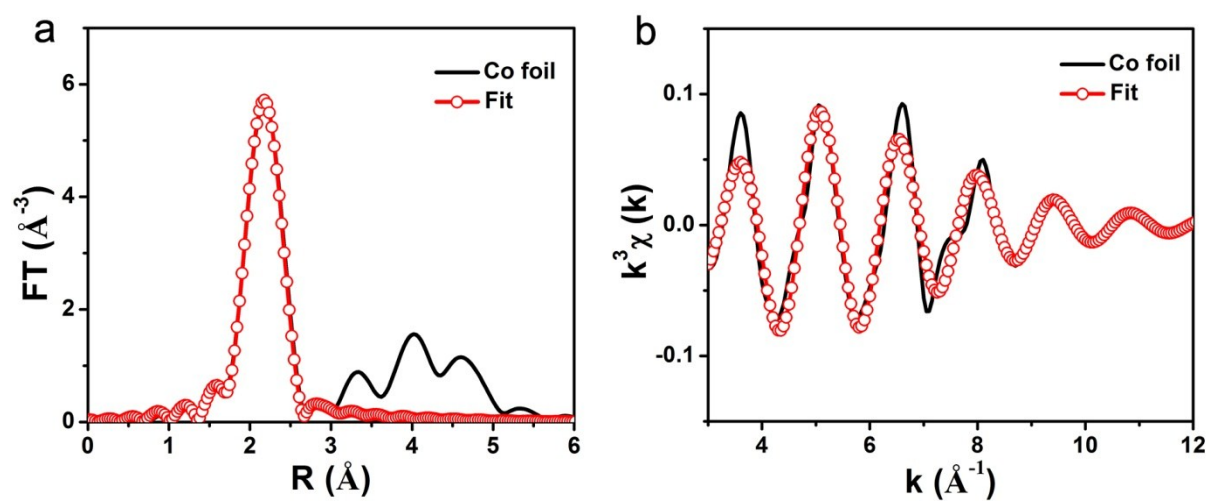

**Figure S8.** The corresponding EXAFS fitting curves of the Co foil in (a) R space and (b) k space at Co K-edge.



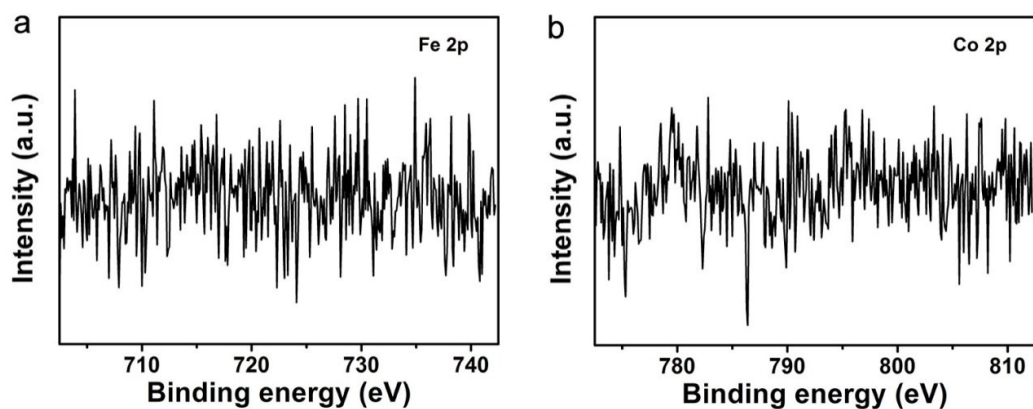

**Figure S9.** High resolution XPS spectra of (a) Fe and (b) Co in FeCo-IA/NC.

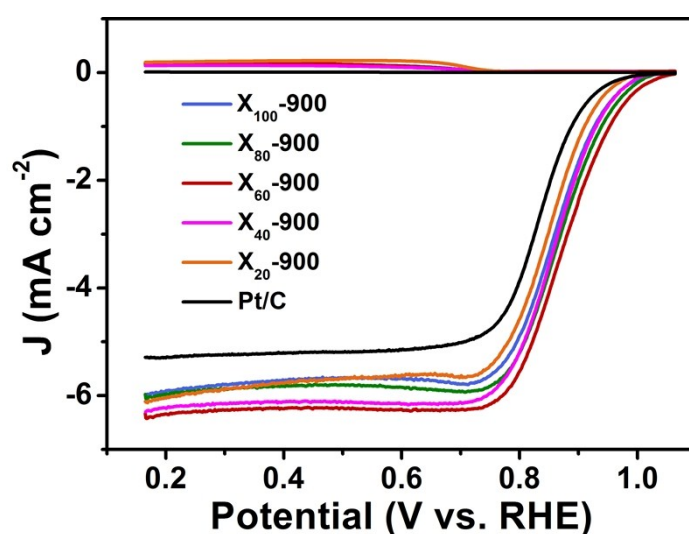

**Figure S10.** RRDE curves of samples with different metal content ( $X = 100, 80, 60, 40$ , and  $20$ ) and the commercial Pt/C in  $O_2$ -saturated  $0.10\text{ M KOH}$  with the scan rate of  $5\text{ mV s}^{-1}$  and rotating speed of  $1600\text{ rpm}$ .

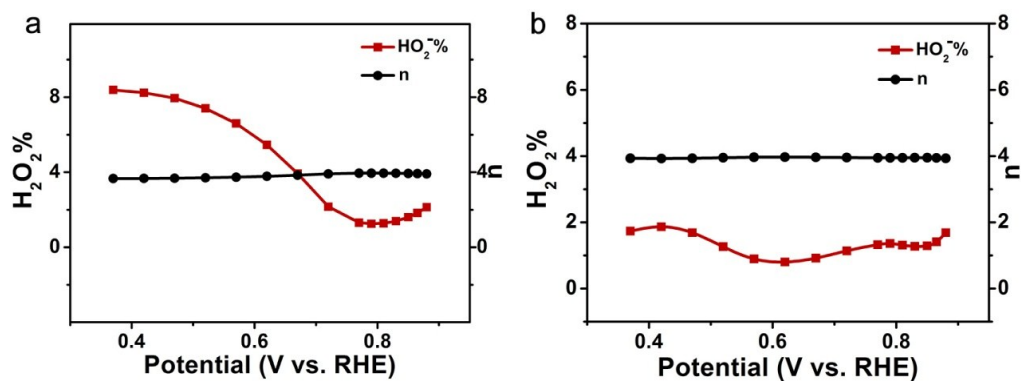

**Figure S11.**  $HO_2^-$ % and electron transfer number ( $n$ ) of (a) FeCo-IA/NC and (b) Pt/C.

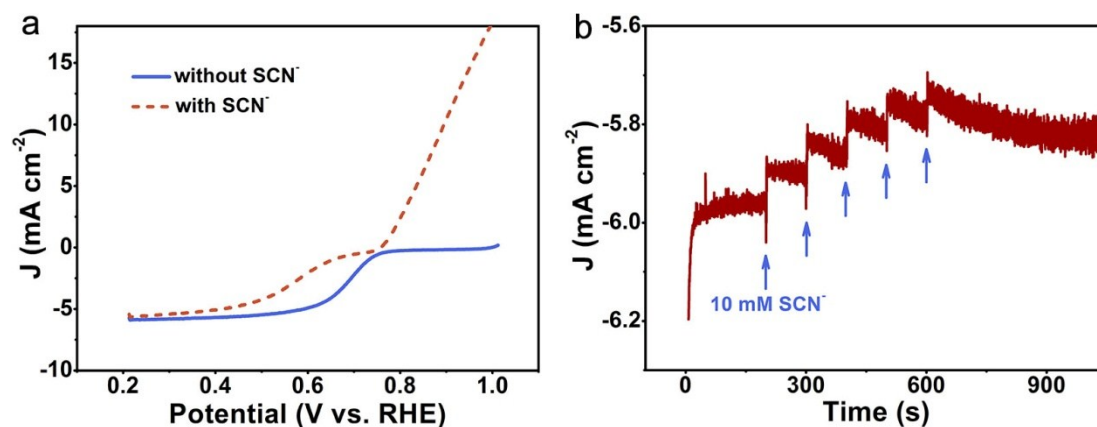

**Figure S12.** (a) LSV curves of FeCo-IA/NC for ORR before and after addition of 10 mM SCN<sup>-</sup> into 0.50 M H<sub>2</sub>SO<sub>4</sub>. (b) I-t curve of FeCo-IA/NC for ORR with addition of SCN<sup>-</sup> into 0.50 M H<sub>2</sub>SO<sub>4</sub>.

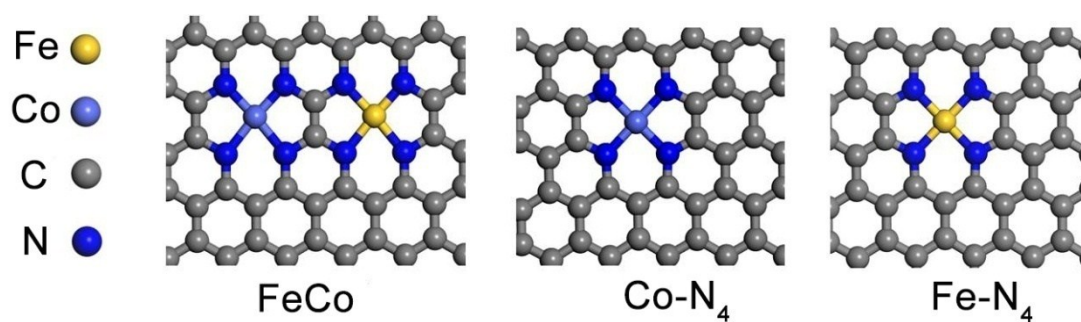

**Figure S13.** Structure models for FeCo-IA/NC (FeCo), Co-IA/NC (Co-N<sub>4</sub>), and Fe-IA/NC (Fe-N<sub>4</sub>).

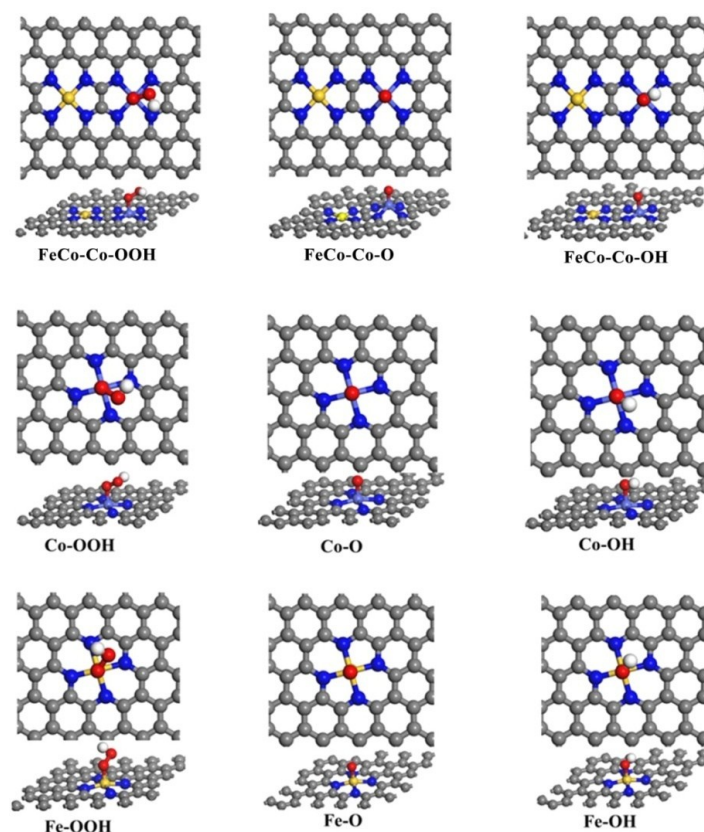

**Figure S14.** The adsorption structures for OOH, O, and OH in ORR process of the established configurations.

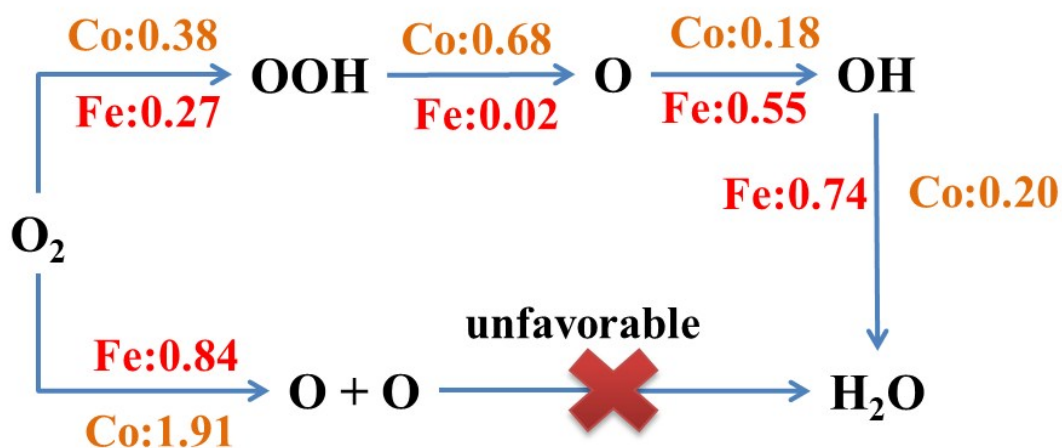

**Figure S15.** The barriers for the possible elementary reactions on FeCo structure. We calculated the elementary barriers for the mechanism of  $O_2 \rightarrow OOH \rightarrow O \rightarrow OH \rightarrow H_2O$  (association pathway, denoted as path 1) and  $O_2 \rightarrow 2O \rightarrow 2OH \rightarrow H_2O$  (dissociation pathway, denoted as path 2). The detailed computational methods are shown in Fig. S16-17. It is seen that the elementary reaction of  $O_2 \rightarrow 2O$  shows

higher barrier than that of  $\text{O}_2 + \text{H} \rightarrow \text{OOH}$ . This suggests that the path 1 is favored in ORR, compared to path 2. Furthermore, other elementary reaction barriers in path 1 are lower than  $\text{O}_2$  dissociation, which further proves that the path 1 will be the main channel for the ORR on FeCo structure. In addition, many reported literatures have demonstrated that  $\text{FeN}_4$  and  $\text{CoN}_4$  structures take association pathway for the ORR by calculating activation barriers.<sup>[5-8]</sup>

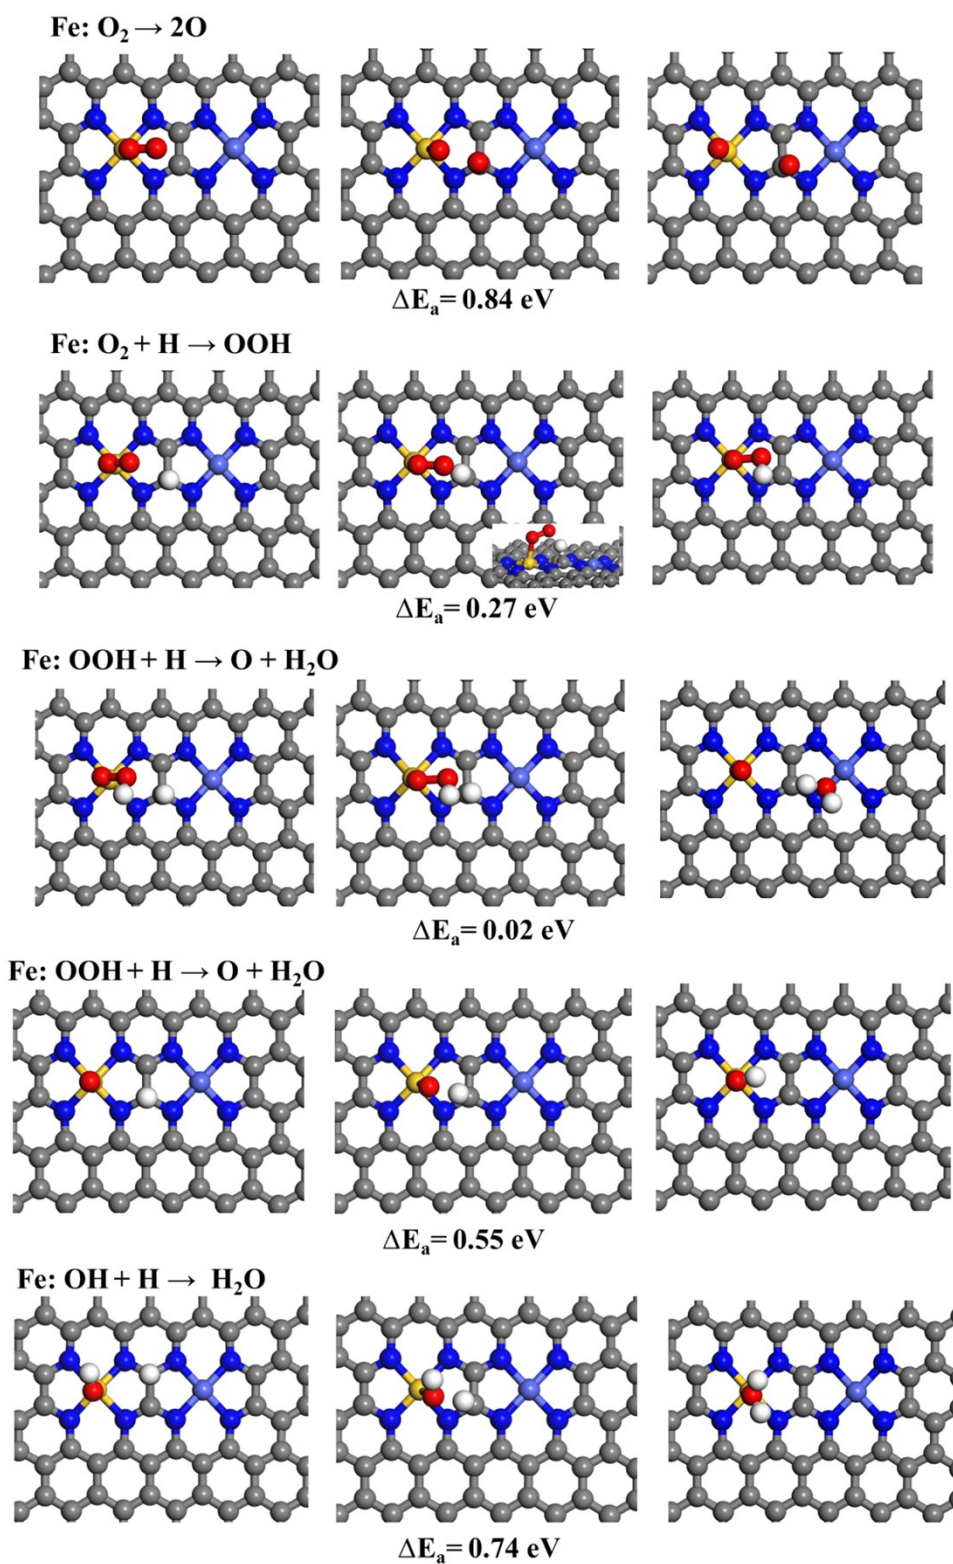

**Figure S16.** The structures for elementary reactions in ORR on Fe center of FeCo.



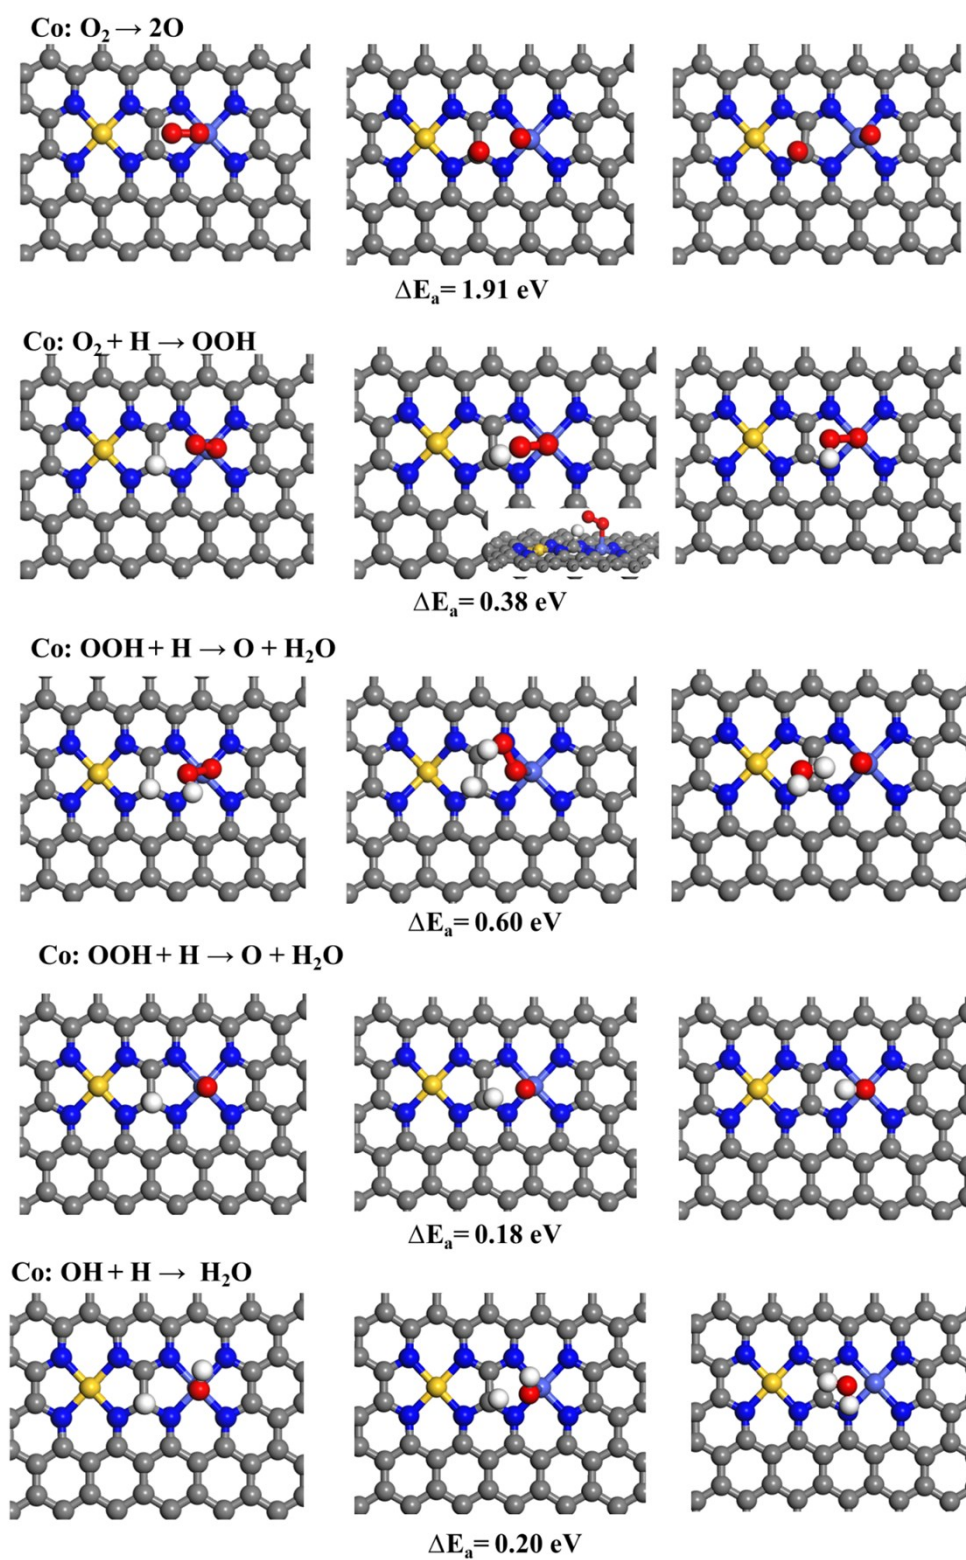

**Figure S17.** The structures for elementary reactions in ORR on Co center of FeCo.

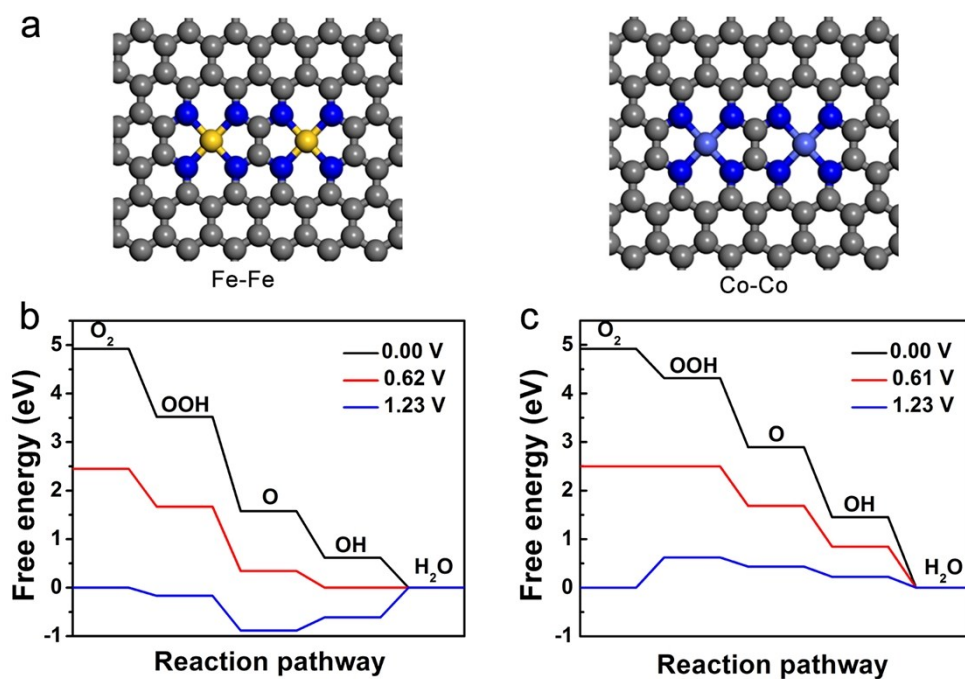

**Figure S18.** The structure models (a) and the free energy changes of ORR on (b) Fe-Fe and (c) Co-Co structures.

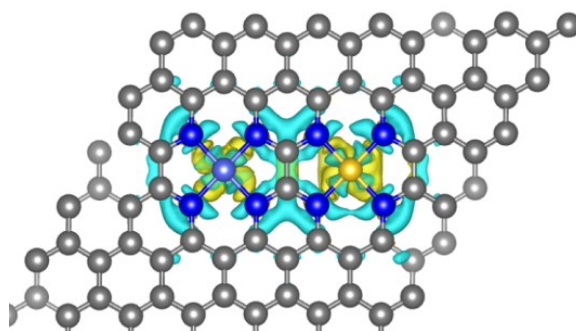

**Figure S19.** Differential charge density distribution on the structure model of FeCo. The yellow and blue areas denote the charge depletion and accumulation, respectively. The isosurface value of differential charge density distribution is  $0.003 \text{ e}/\text{\AA}^3$ .

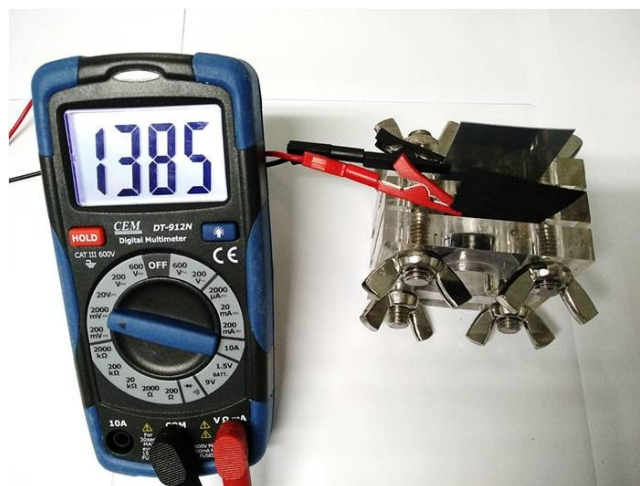

**Figure S20.** Photograph of the Zn-air battery employing the commercial cathode, giving an open-circuit potential of 1.385 V.

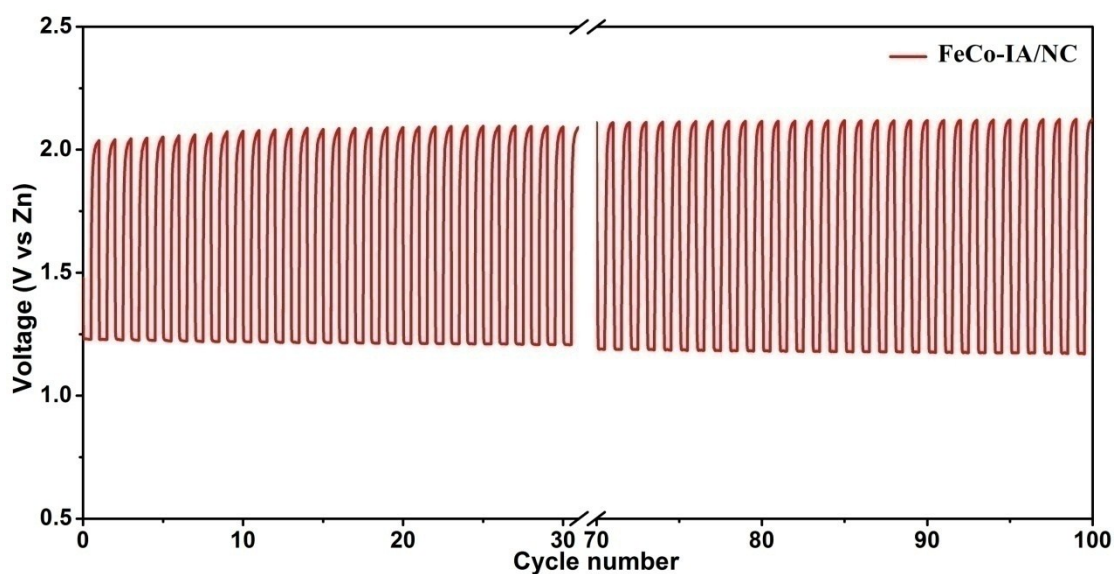

**Figure S21.** Charge/discharge curves of the Zn-air battery with FeCo-IA/NC as the air electrodes at a current density of 10 mA cm<sup>-2</sup> (20 min per cycle).

**Table S1.** EXAFS fitting parameters at the Fe and Co K-edge EXAFS fitting of FeCo-IA/NC. ( $S_0^2=0.82$ )

| Sample    | Path  | CN      | R (Å)     | $\sigma^2$ (Å <sup>2</sup> ) | $\Delta E_0$ (eV) | R factor |
|-----------|-------|---------|-----------|------------------------------|-------------------|----------|
| Fe foil   | Fe-Fe | 8*      | 2.47±0.01 | 0.004                        | 6.6±1.3           | 0.002    |
|           | Fe-Fe | 6*      | 2.85±0.01 | 0.006                        | 5.3±2.7           |          |
| Sample-Fe | Fe-N  | 4.1±0.9 | 1.99±0.01 | 0.009                        | -1.8±2.3          | 0.015    |
| Co foil   | Co-Co | 12*     | 2.49±0.00 | 0.006                        | 7.2±0.5           | 0.002    |
| Sample-Co | Co-N  | 4.3±0.5 | 1.90±0.01 | 0.008                        | 5.2±2.7           | 0.006    |

CN: coordination numbers;  $R$ : bond distance;  $\sigma^2$ : Debye-Waller factors;  $\Delta E_0$ : the inner potential correction.  $R$  factor: goodness of fit. \* the experimental EXAFS fit of metal foil by fixing CN as the known crystallographic value.

**Table S2.** The doping content of Fe and Co in the samples characterized by ICP-OES.

| Sample                               | Fe (wt %) | Co (wt %) |
|--------------------------------------|-----------|-----------|
| X <sub>100</sub> -900                | 0.08      | 0.45      |
| X <sub>80</sub> -900                 | 0.15      | 0.76      |
| FeCo-IA/NC<br>(X <sub>60</sub> -900) | 0.26      | 1.06      |
| X <sub>40</sub> -900                 | 0.33      | 1.28      |
| X <sub>20</sub> -900                 | 0.42      | 1.51      |
| Fe-IA/NC                             | 0.23      | -         |
| Co-IA/NC                             | -         | 1.02      |

**Table S3.** The comparison of ORR activities ( $E_{\text{onset}}$  and  $E_{1/2}$ ) of the samples with different metal content ( $X = 100, 80, 60, 40$ , and  $20$ ).

| Sample                         | $E_{\text{onset}}$ (V) | $E_{1/2}$ (V) |
|--------------------------------|------------------------|---------------|
| $X_{100}$ -900                 | 1.00                   | 0.86          |
| $X_{80}$ -900                  | 1.01                   | 0.87          |
| FeCo-IA/NC<br>( $X_{60}$ -900) | 1.03                   | 0.88          |
| $X_{40}$ -900                  | 1.00                   | 0.86          |
| $X_{20}$ -900                  | 0.99                   | 0.85          |



**Table S4.** Comparison of the ORR activity of FeCo-IA/NC with recently reported isolated metal atoms doped carbon catalysts in 0.10 M KOH. It can be observed that FeCo-IA/NC is one of the most active isolated transition metal atoms doped carbon catalysts for ORR.

| Catalyst                                                         | E <sub>onset</sub> (V) | E <sub>1/2</sub> (V) | Ref.      |
|------------------------------------------------------------------|------------------------|----------------------|-----------|
| Single Co atoms on N-doped carbon                                | 0.97                   | 0.845                | [9]       |
| Single Fe atoms on N-doped carbon                                | 1.046                  | 0.87                 | [10]      |
| Isolated Zn-Co atomic pair on N-doped carbon                     | 1.004                  | 0.861                | [11]      |
| Single Co atoms on N-doped carbon flake arrays/carbon nanofibers | -                      | 0.88                 | [12]      |
| Single Fe atoms on N-doped carbon nanotube aerogels              | 0.97                   | 0.88                 | [13]      |
| Single Fe atoms on N-doped carbon                                | 0.954                  | 0.834                | [14]      |
| Single Fe atoms on N,S codoped carbon                            | -                      | 0.85                 | [15]      |
| Single Co atoms on N-doped carbon                                | 0.982                  | 0.881                | [16]      |
| Single Fe atoms on 2D N-doped carbon                             | -                      | 0.853                | [17]      |
| Single Fe atoms on N-doped carbon                                | -                      | 0.869                | [18]      |
| Single Fe atoms on N-doped carbon                                | 0.972                  | 0.885                | [19]      |
| Single Co atoms on g-C <sub>3</sub> N <sub>4</sub>               | 0.90                   | 0.85                 | [20]      |
| Isolated Fe and Co atoms dual sites on N-doped carbon            | 0.98                   | 0.88                 | This work |

**Table S5.** The energies employed in free energy diagram for ORR on the Fe site in FeCo.

| U = 0.00 V |                  |      |      |         |                 |       |
|------------|------------------|------|------|---------|-----------------|-------|
|            | E <sub>DFT</sub> | ZPE  | TS   | G       | ΔG <sub>U</sub> | ΔG    |
| *          | -627.94          | 0    | 0    | -627.94 | 0.00            | 4.92  |
| OOH*       | -642.38          | 0.41 | 0.17 | -642.13 | 0.00            | 4.17  |
| O*         | -633.19          | 0.06 | 0.08 | -633.21 | 0.00            | 2.19  |
| OH*        | -637.87          | 0.37 | 0.10 | -637.60 | 0.00            | 1.22  |
| U=0.75 V   |                  |      |      |         |                 |       |
| *          | -627.94          | 0    | 0    | -627.94 | 0.00            | 1.90  |
| OOH*       | -642.38          | 0.41 | 0.17 | -642.13 | 0.75            | 1.90  |
| O*         | -633.19          | 0.06 | 0.08 | -633.21 | 0.75            | 0.68  |
| OH*        | -637.87          | 0.37 | 0.10 | -637.60 | 0.75            | 0.47  |
| U=1.23 V   |                  |      |      |         |                 |       |
| *          | -627.94          | 0    | 0    | -627.94 | 0.00            | 0.00  |
| OOH*       | -642.38          | 0.41 | 0.17 | -642.13 | 1.23            | 0.48  |
| O*         | -633.19          | 0.06 | 0.08 | -633.21 | 1.23            | -0.27 |
| OH*        | -637.87          | 0.37 | 0.10 | -637.60 | 1.23            | -0.01 |

**Table S6.** The energies employed in free energy diagram for ORR on the Co site in FeCo.

| U = 0.00 V |                  |      |      |         |                 |      |
|------------|------------------|------|------|---------|-----------------|------|
|            | E <sub>DFT</sub> | ZPE  | TS   | G       | ΔG <sub>U</sub> | ΔG   |
| *          | -627.94          | 0.00 | 0.00 | -627.94 | 0.00            | 4.92 |
| OOH*       | -642.16          | 0.43 | 0.19 | -641.91 | 0.00            | 4.39 |
| O*         | -633.12          | 0.06 | 0.07 | -633.13 | 0.00            | 2.26 |

|          |         |      |      |         |      |       |
|----------|---------|------|------|---------|------|-------|
| OH*      | -637.69 | 0.35 | 0.10 | -637.43 | 0.00 | 1.41  |
| U=0.53 V |         |      |      |         |      |       |
| *        | -627.94 | 0.00 | 0.00 | -627.94 | 0.00 | 2.79  |
| OOH*     | -642.16 | 0.43 | 0.19 | -641.91 | 0.53 | 2.79  |
| O*       | -633.12 | 0.06 | 0.07 | -633.13 | 0.53 | 1.19  |
| OH*      | -637.69 | 0.35 | 0.10 | -637.43 | 0.53 | 0.88  |
| U=1.23 V |         |      |      |         |      |       |
| *        | -627.94 | 0.00 | 0.00 | -627.94 | 0.00 | 0.00  |
| OOH*     | -642.16 | 0.43 | 0.19 | -641.91 | 1.23 | 0.70  |
| O*       | -633.12 | 0.06 | 0.07 | -633.13 | 1.23 | -0.20 |
| OH*      | -637.69 | 0.35 | 0.10 | -637.43 | 1.23 | 0.18  |

**Table S7.** The energies employed in free energy diagram for ORR on the CoN<sub>4</sub>.

|            |                  |      |      |         |                 |      |
|------------|------------------|------|------|---------|-----------------|------|
| U = 0.00 V |                  |      |      |         |                 |      |
|            | E <sub>DFT</sub> | ZPE  | TS   | G       | ΔG <sub>U</sub> | ΔG   |
| *          | -442.75          | 0.00 | 0.00 | -442.75 | 0.00            | 4.92 |
| OOH*       | -456.85          | 0.43 | 0.23 | -456.65 | 0.00            | 4.45 |
| O*         | -446.85          | 0.06 | 0.07 | -446.86 | 0.00            | 3.34 |
| OH*        | -452.41          | 0.34 | 0.12 | -452.19 | 0.00            | 1.46 |
| U=0.47 V   |                  |      |      |         |                 |      |
| *          | -445.42          | 0.00 | 0.00 | -445.42 | 0.00            | 3.05 |
| OOH*       | -459.86          | 0.43 | 0.21 | -459.64 | 0.47            | 3.05 |
| O*         | -450.54          | 0.06 | 0.08 | -450.56 | 0.47            | 2.41 |
| OH*        | -455.41          | 0.36 | 0.11 | -455.16 | 0.47            | 0.99 |
| U=1.23 V   |                  |      |      |         |                 |      |
| *          | -445.42          | 0.00 | 0.00 | -445.42 | 1.23            | 0.00 |

|      |         |      |      |         |      |      |
|------|---------|------|------|---------|------|------|
| OOH* | -459.86 | 0.43 | 0.21 | -459.64 | 1.23 | 0.76 |
| O*   | -450.54 | 0.06 | 0.08 | -450.56 | 1.23 | 0.88 |
| OH*  | -455.41 | 0.36 | 0.11 | -455.16 | 1.23 | 0.23 |

**Table S8.** The energies employed in free energy diagram for ORR on the FeN<sub>4</sub>.

| U = 0.00 V |                  |      |      |         |                 |       |
|------------|------------------|------|------|---------|-----------------|-------|
|            | E <sub>DFT</sub> | ZPE  | TS   | G       | ΔG <sub>U</sub> | ΔG    |
| *          | -443.26          | 0.00 | 0.00 | -443.26 | 0.00            | 4.92  |
| OOH*       | -458.19          | 0.43 | 0.19 | -457.95 | 0.00            | 3.66  |
| O*         | -449.07          | 0.06 | 0.07 | -449.08 | 0.00            | 1.64  |
| OH*        | -453.73          | 0.34 | 0.11 | -453.50 | 0.00            | 0.65  |
| U=0.65 V   |                  |      |      |         |                 |       |
| *          | -443.26          | 0.00 | 0.00 | -443.26 | 0.00            | 2.32  |
| OOH*       | -458.19          | 0.43 | 0.19 | -457.95 | 0.65            | 1.71  |
| O*         | -449.07          | 0.06 | 0.07 | -449.08 | 0.65            | 0.34  |
| OH*        | -453.73          | 0.34 | 0.11 | -453.50 | 0.65            | 0.00  |
| U=1.23 V   |                  |      |      |         |                 |       |
| *          | -443.26          | 0.00 | 0.00 | -443.26 | 1.23            | 0     |
| OOH*       | -458.19          | 0.43 | 0.19 | -457.95 | 1.23            | -0.03 |
| O*         | -449.07          | 0.06 | 0.07 | -449.08 | 1.23            | -0.82 |
| OH*        | -453.73          | 0.34 | 0.11 | -453.50 | 1.23            | -0.56 |

**Table S9.** The Bader charge (in e) for metal atoms in FeCo, FeN<sub>4</sub>, and CoN<sub>4</sub> structures, respectively.

| Structure        | Fe     | Co     |
|------------------|--------|--------|
| FeN <sub>4</sub> | 6.9164 | –      |
| CoN <sub>4</sub> | –      | 8.0893 |
| FeCo             | 6.9537 | 7.8843 |

## References

- [1] I. C. Man, H. Y. Su, F. Calle - Vallejo, H. A. Hansen, J. I. Martínez, N. G. Inoglu, J. Kitchin, T. F. Jaramillo, J. K. Nørskov, J. Rossmeisl, *ChemCatChem* **2011**, 3, 1159-1165.
- [2] J. K. Nørskov, J. Rossmeisl, A. Logadottir, L. Lindqvist, J. R. Kitchin, T. Bligaard, H. Jónsson, *J. Phys. Chem. B* **2004**, 108, 17886-17892.
- [3] M. Jiao, W. Song, K. Li, Y. Wang, Z. Wu, *J. Phys. Chem. C* **2016**, 120, 8804-8812.
- [4] J. D. Cox, D. D. Wagman, V. A. Medvedev, Hemisphere Publishing Corp., New York, 1984, 1.
- [5] J. Zhang, Z. Wang, Z. Zhu, *J. Power Sources* **2014**, 255, 65-69.
- [6] S. Kattel, G. Wang, *J. Phys. Chem. Lett.* **2014**, 5, 452-456.
- [7] M. Xiao, H. Zhang, Y. Chen, J. Zhu, L. Gao, Z. Jin, J. Ge, Z. Jiang, S. Chen, C. Liu, W. Xing, *Nano Energy* **2018**, 46, 396-403.
- [8] F. Li, H. Shu, C. Hu, Z. Shi, X. Liu, P. Liang, X. Chen, *ACS Appl. Mater. Interfaces* **2015**, 7, 27405-27413.
- [9] Y. Deng, B. Chi, X. Tian, Z. Cui, E. Liu, Q. Jia, W. Fan, G. Wang, D. Dang, M. Li, K. Zang, J. Luo, Y. Hu, S. Liao, X. Sun, S. Mukerjee, *J. Mater. Chem. A* **2019**, 7, 5020-5030.
- [10] Y. Chen, Z. Li, Y. Zhu, D. Sun, X. Liu, L. Xu, Y. Tang, *Adv. Mater.* **2019**, 31, 1806312.



- [11] Z. Lu, B. Wang, Y. Hu, W. Liu, Y. Zhao, R. Yang, Z. Li, J. Luo, B. Chi, Z. Jiang, M. Li, S. Mu, S. Liao, J. Zhang, X. Sun, *Angew. Chem. Int. Ed.* **2019**, *58*, 2622-2626.
- [12] D. Ji, L. Fan, L. Li, S. Peng, D. Yu, J. Song, S. Ramakrishna, S. Guo, *Adv. Mater.* **2019**, 1808267.
- [13] C. Zhu, S. Fu, J. Song, Q. Shi, D. Su, M. H. Engelhard, X. Li, D. Xiao, D. Li, L. Estevez, D. Du, Y. Lin, *Small* **2017**, *13*, 1603407.
- [14] Q.-L. Zhu, W. Xia, L.-R. Zheng, R. Zou, Z. Liu, Q. Xu, *ACS Energy Lett.* **2017**, *2*, 504-511.
- [15] P. Chen, T. Zhou, L. Xing, K. Xu, Y. Tong, H. Xie, L. Zhang, W. Yan, W. Chu, C. Wu, Y. Xie, *Angew. Chem. Int. Ed.* **2017**, *56*, 610-614.
- [16] P. Yin, T. Yao, Y. Wu, L. Zheng, Y. Lin, W. Liu, H. Ju, J. Zhu, X. Hong, Z. Deng, G. Zhou, S. Wei, Y. Li, *Angew. Chem. Int. Ed.* **2016**, *55*, 10800-10805.
- [17] C. Wang, W. Chen, K. Xia, N. Xie, H. Wang, Y. Zhang, *Small* **2019**, *15*, 1804966.
- [18] J. Xie, B. Q. Li, H. J. Peng, Y. W. Song, J. X. Li, Z. W. Zhang, Q. Zhang, *Angew. Chem. Int. Ed.* **2019**, *58*, 4963-4967.
- [19] Y. Pan, S. Liu, K. Sun, X. Chen, B. Wang, K. Wu, X. Cao, W. C. Cheong, R. Shen, A. Han, Z. Chen, L. Zheng, J. Luo, Y. Lin, Y. Liu, D. Wang, Q. Peng, Q. Zhang, C. Chen, Y. Li, *Angew. Chem. Int. Ed.* **2018**, *57*, 8614-8618.
- [20] Y. Zheng, Y. Jiao, Y. Zhu, Q. Cai, A. Vasileff, L. H. Li, Y. Han, Y. Chen, S.-Z. Qiao, *J. Am. Chem. Soc.* **2017**, *139*, 3336-3339.
